# Supplementary material
Source: PubMed Central journal article supplement (PMC6158097)
Supplement: NIHMS961542-supplement-249_2018_1301_MOESM1_ESM.pdf [file NIHMS961542-supplement-249_2018_1301_MOESM1_ESM.pdf]

# Multi-Wavelength Analytical Ultracentrifugation of Human Serum Albumin complexed with Porphyrin

## Supplemental Information

Courtney N. Johnson<sup>1</sup>, Gary E. Gorbet<sup>1</sup>, Heidi Ramsower<sup>2</sup>, Julio Urquidi<sup>2</sup>, Lorenzo Brancaloni<sup>2</sup>, and Borries Demeler<sup>1</sup>

<sup>1</sup>UTHSCSA, Dept. of Biochemistry, San Antonio, Texas

<sup>2</sup>UTSA, Dept. of Physics and Astronomy, San Antonio, Texas

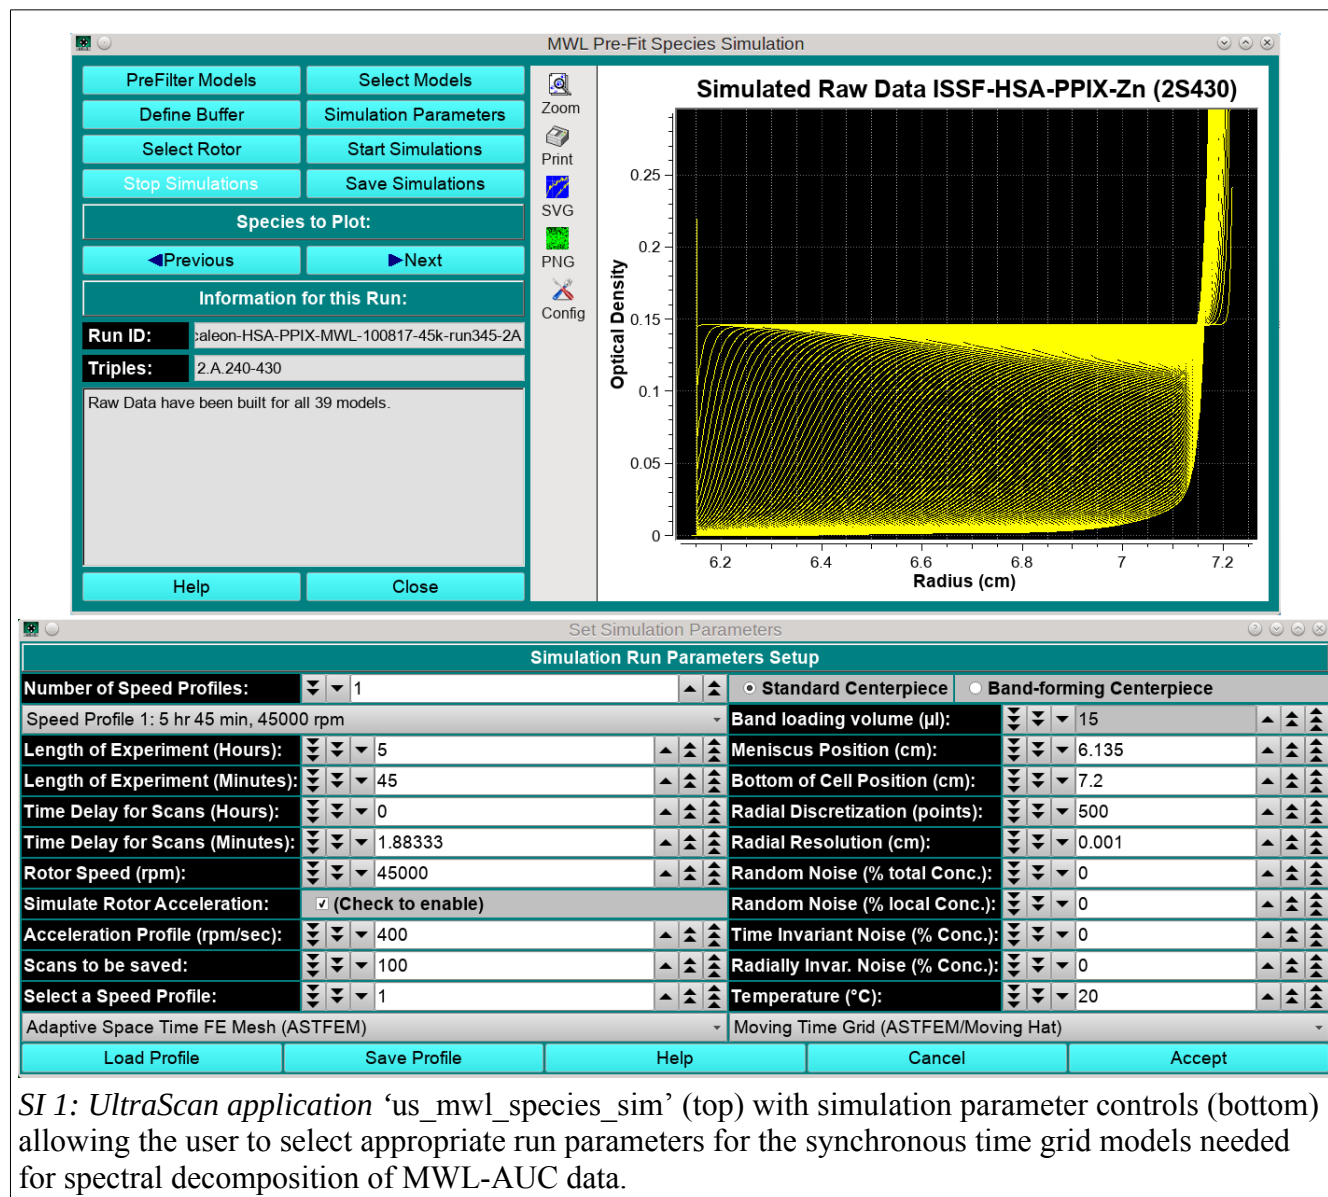

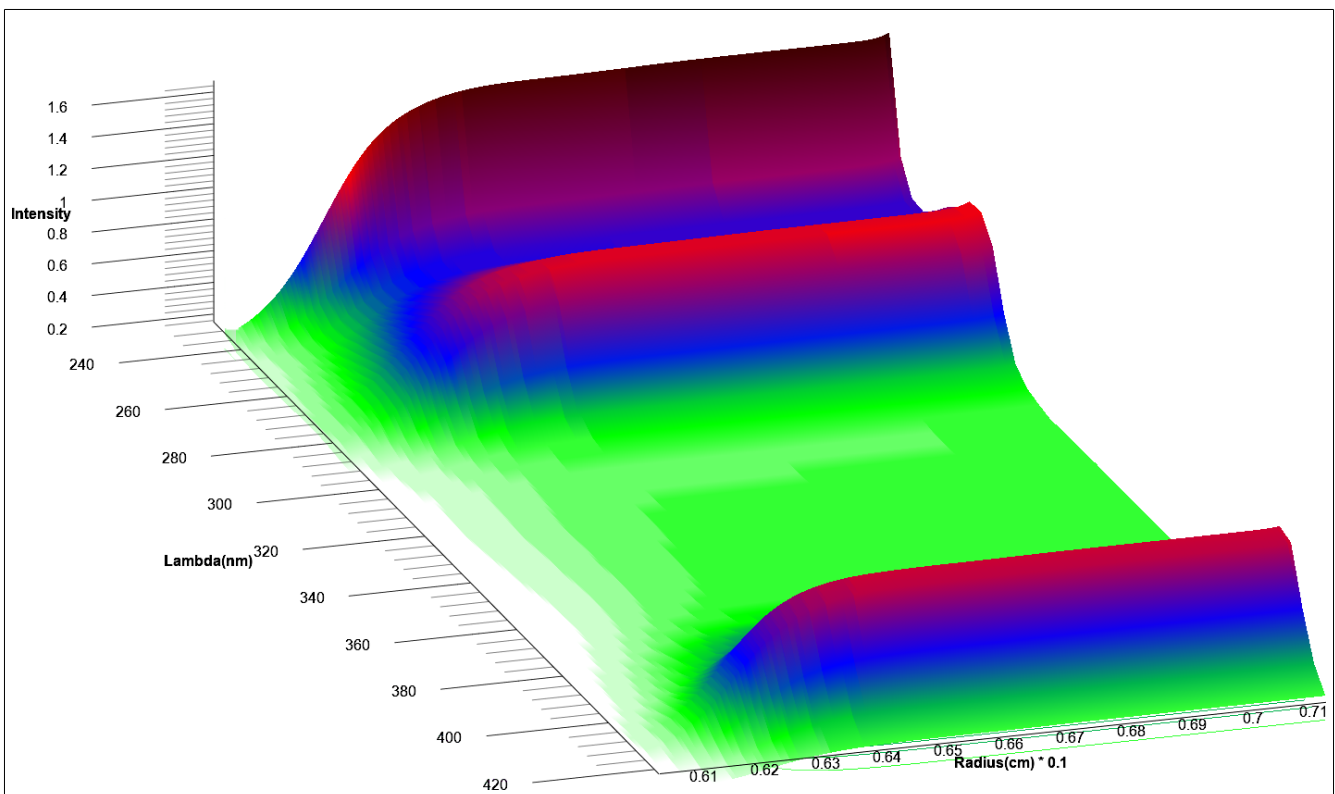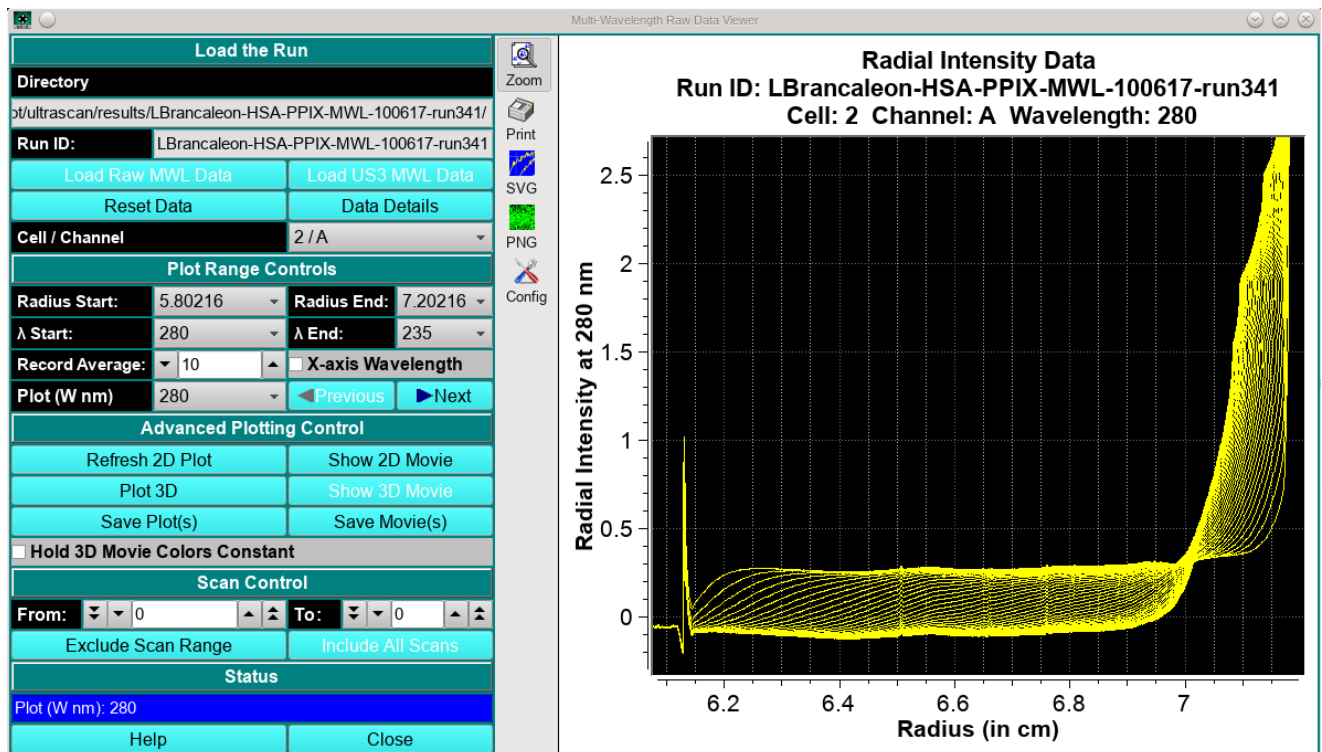

SI 2: Top: 3D view of a single scan from a simulated, time-synchronized MWL-AUC dataset derived from the iterative 2DSA models. Bottom: Multi-wavelength data viewer in UltraScan.

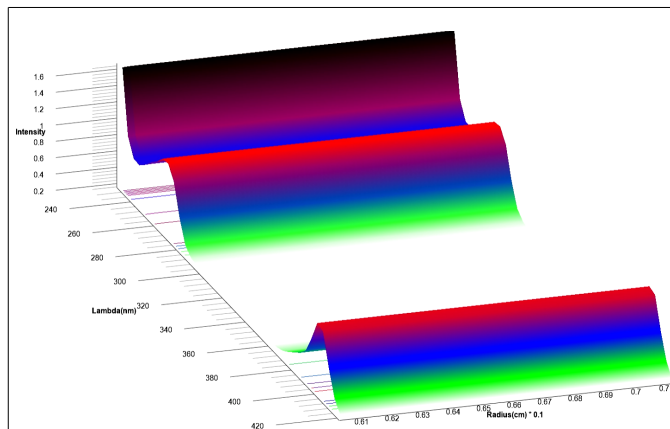

SI 3: Sedimentation movie of HSA-PPIX-Zn after simulation of time-synchronized MWL-AUC surfaces for each scan.

| Load Experiment                                      |                                      | Run Details                                 |     |
|------------------------------------------------------|--------------------------------------|---------------------------------------------|-----|
| <input checked="" type="checkbox"/> Latest Data Edit | <input type="radio"/> Database       | <input checked="" type="radio"/> Local Disk |     |
| View Data Report                                     | Save Data                            |                                             |     |
| Load Species Fits                                    | Species Fit Data                     |                                             |     |
| Species to Plot:                                     |                                      |                                             |     |
| ◀ Previous                                           |                                      | Next ▶                                      |     |
| Information for this Run                             |                                      |                                             |     |
| Run ID / Edit ID:                                    | IX-MWL-100617-run352-2A / 1712282145 |                                             |     |
| Avg Temperature:                                     | 20.0 °C                              |                                             |     |
| Simulation - HSA-apo.extinction                      |                                      |                                             |     |
| Cell / Channel / Wavelength                          |                                      |                                             |     |
| 2 / S / 240-430                                      |                                      |                                             |     |
| Scan focus from:                                     | ▼▼▼                                  | 0                                           | ▲▲▲ |
| to:                                                  | ▼▼▼                                  | 0                                           | ▲▲▲ |
| Exclude Scan Range                                   | Reset Scan Range                     |                                             |     |
| Reset                                                | Help                                 | Close                                       |     |

Zoom

Print

SVG

PNG

Config

**Output Velocity Data for**  
ISSF-LBrancaleon-HSA-PPIX-MWL-100617-run352-2A (2/S/002)

**Input Velocity Data for**  
ISSF-LBrancaleon-HSA-PPIX-MWL-100617-run352-2A (2/S/335)

SI 4: Multi-wavelength AUC Species Fit module (us\_mwl\_species\_fit)
